# Supplementary material
Source: Springer Nature journal article supplement (https://www.springermedizin.de/resource/supplementary/12981_2009_114_MOESM4_ESM.pdf/9603852)

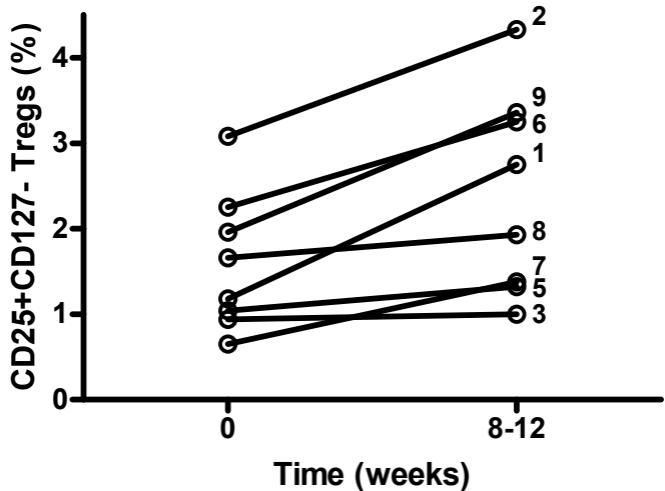

Supplement: MOESM4 [file 9603852]
